# Supplementary material for: Crystal lattice engineering in a screw-dislocated ZnO nanocone photocatalyst by carbon doping
Source: Royal Society of Chemistry journal article supplement (doi:10.1039/d2ma00098a), 2022-01-01
Supplement: d2ma00098a1.pdf [file d2ma00098a1.pdf]

Supplementary Information

**Crystal Lattice Engineering in  
Screw-dislocated ZnO Nanocone Photocatalyst  
by Carbon Doping**

Jesna Louis,<sup>a,c</sup> Nisha T. Padmanabhan,<sup>a,d</sup> Madambi K Jayaraj,<sup>b,c</sup>  
Honey John<sup>a,c\*</sup>

*<sup>a</sup>Department of Polymer Science and Rubber Technology, Cochin University of Science and  
Technology, Kerala 682022, India.*

*<sup>b</sup>University of Calicut, Malappuram, Kerala 673635, India.*

*<sup>c</sup>Inter University Centre for nanomaterials and Devices (IUCND), Cochin University of Science and  
Technology, Kerala 682022, India.*

*<sup>d</sup>Department of Chemistry and Centre for Research, St. Teresas College, Ernakulam, Kerala 682011,  
India*

*Corresponding author E-mail address: honey@cusat.ac.in*

*Corresponding author E-mail address: honey@cusat.ac.in*

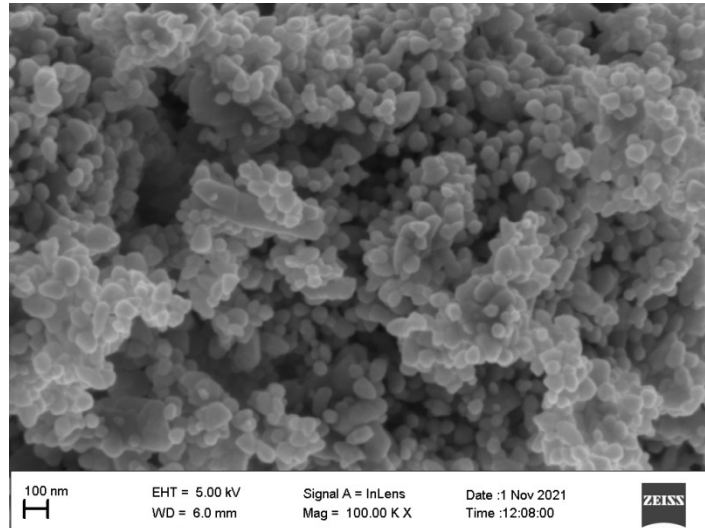

Figure S1. SEM image of ZnO synthesised without CTAB

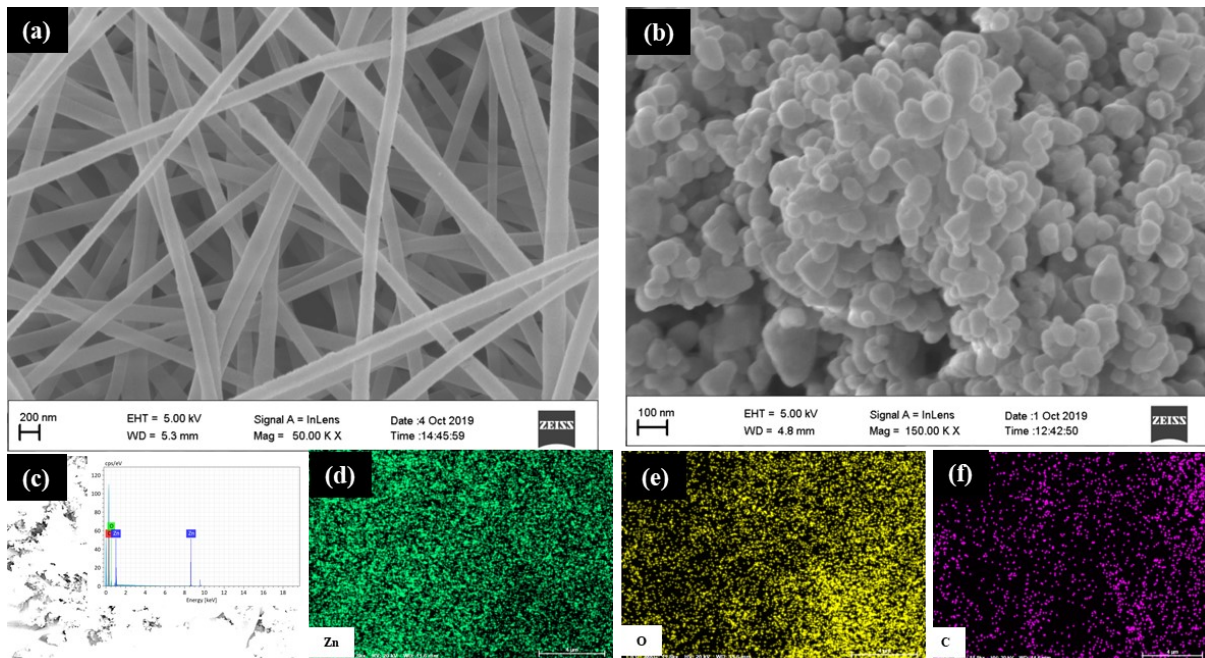

Figure S2. SEM micrographs of electrospun ZnO-PVA nanofibers (Z1P10) (a) before annealing and (b) after annealing. SEM-EDS elemental mapping of Z1P10 sample: (c) Secondary electron image with the inset showing the EDS spectrum, Elemental mapping of (d) Zn, (e) O, and (f) C.

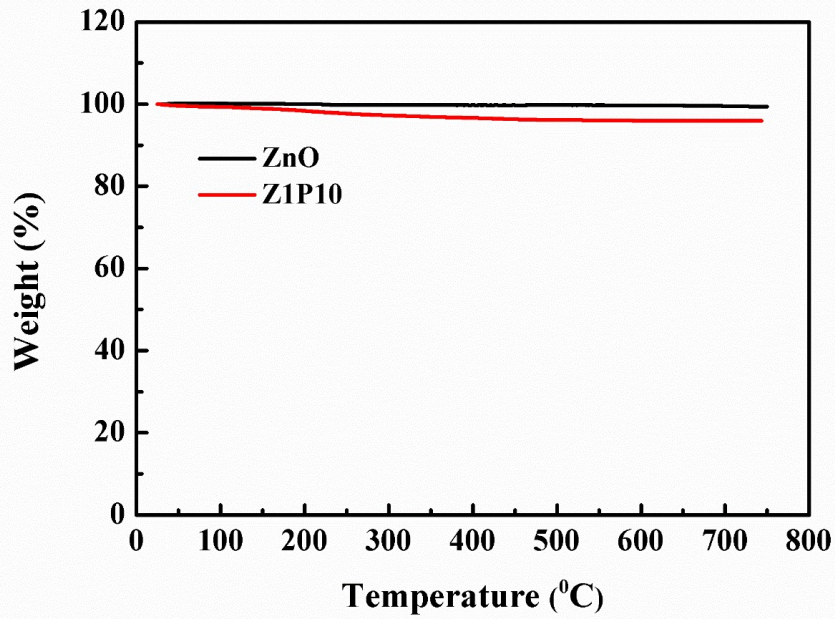

Figure S3. TGA curves of pure ZnO and Z1P10 sample.

The fluorescence lifetime ( $\tau$ ) of CDs was calculated by time-resolved photoluminescence measurements. The decay trace for samples was fitted using tri-exponential functions  $Y(t)$  based on non-linear least squares analysis in Equation.

$$Y(t) = A_1 \exp\left(-\frac{t}{\tau_1}\right) + A_2 \exp\left(-\frac{t}{\tau_2}\right) + A_3 \exp\left(-\frac{t}{\tau_3}\right)$$

Where  $A_1$ ,  $A_2$  and  $A_3$  are the fractional contributions of decay lifetimes  $\tau_1$ ,  $\tau_2$  and  $\tau_3$  respectively. The average lifetime  $\langle\tau\rangle$  is calculated using the equation

$$\langle\tau\rangle = \sum_{i=1}^3 \frac{A_i \tau_i}{A_i \tau_i^2}$$

Table S1. Analysis of average carrier lifetimes of samples

| Sample | $\tau_1$ (ns) | $A_1$ (%) | $\tau_2$ (ns) | $A_2$ (%) | $\tau_3$ (ns) | $A_3$ (%) | $\langle\tau\rangle$ (ns) | $\chi^2$ |
|--------|---------------|-----------|---------------|-----------|---------------|-----------|---------------------------|----------|
| ZnO    | 0.499         | -738.71   | 0.489         | 831.35    | 2.86          | 7.37      | 1.27                      | 1.12     |
| Z1P7   | 0.1           | 866.85    | 3.28          | 4.01      | 0.112         | -770.86   | 3.12                      | 1.20     |
| Z1P10  | 2.19          | 14.64     | 7.29          | 5.24      | 0.412         | 80.12     | 3.51                      | 1.20     |

|              |       |          |     |     |       |         |      |      |
|--------------|-------|----------|-----|-----|-------|---------|------|------|
| <b>Z1P12</b> | 0.097 | -4456.41 | 3.1 | 4.3 | 0.095 | 4552.11 | 2.99 | 1.21 |
|--------------|-------|----------|-----|-----|-------|---------|------|------|

The adsorption percentage of the samples can be evaluated by observing the absorbance at  $\lambda_{\max}$ . For that 10 mg of photocatalyst was mixed with 10 ppm dye solution and stirred for 30 min at room temperature to reach equilibrium. The estimated amount of dye adsorbed is  $(A1 - A2)$

calculated using the equation  $\frac{(A1 - A2)}{A1}$ , where A1 is the absorption of blank dye solution and A2 is the absorbance of the sample containing MB solution just after attaining equilibrium. The amount of dye adsorbed on C-ZnO

Table S2. Dye adsorption of ZnO and C:ZnO

| Sample | Dye adsorption |
|--------|----------------|
| ZnO    | 0.08           |
| Z1P7   | 0.12           |
| Z1P10  | 0.21           |
| Z1P12  | 0.04           |

The adsorption of MB is higher for Z1P10 compared to other samples. The degradation rate of photocatalysts is not directly related to dye adsorption percentage and is totally in agreement with previous reports<sup>1-3</sup>. The order of degradation rate of photocatalysts is Z1P10>Z1P7>Z1P12>ZnO does not follow dye adsorption trend of Z1P10>Z1P7>ZnO>Z1P12.

Table S3. Comparison of concentration of catalyst, concentration of dye and photocatalytic efficiency with the existing literature.

| Sample                                     | Degradation efficiency                             | Weight of photocatalyst | Concentration of dye                         | Ref          |
|--------------------------------------------|----------------------------------------------------|-------------------------|----------------------------------------------|--------------|
| C-doped ZnO/TiO <sub>2</sub> nanocomposite | 94% after 45 min<br>Simulated sunlight irradiation | 50 mg                   | Rhodamine B (10 mg L <sup>-1</sup> , 100 mL) | <sup>4</sup> |
| Cu-doped ZnO nanoparticles                 | 91.3% after 75 min<br>UV light                     | 25 mg                   | Methylene blue (100 mL 10 ppm)               | <sup>5</sup> |

|                                                             |                                                          |        |                                                 |           |
|-------------------------------------------------------------|----------------------------------------------------------|--------|-------------------------------------------------|-----------|
| S-doped ZnO nanoparticles                                   | 100% after 90 min<br>Halogen lamp,<br>$\lambda > 400$ nm | 100 mg | Rhodamine B (5 ppm)                             | 6         |
| g-C <sub>3</sub> N <sub>4</sub> /Mn doped ZnO nanocomposite | 98 % of MB after 60 min<br>Sunlight irradiation          | 100 mg | Methylene blue (10 mg L <sup>-1</sup> , 100 mL) | 7         |
| C-doped ZnO                                                 | 98% after 120 min<br>Solar-simulated light irradiation   | 50 mg  | 10 mg/ L Rhodamine B (RhB) (100mL)              | 8         |
| Gd/N co-doped ZnO                                           | 93% after 60 min<br>Solar light irradiation              | 100 mg | Methylene blue (10 mg L <sup>-1</sup> , 100 mL) | 9         |
| C-doped ZnO                                                 | 97% after 90 min<br>Solar-simulated light irradiation    | 10 mg  | Methylene blue (10 ppm, 40 mL)                  | This work |

1. F. Liu, Y. H. Leung, A. B. Djurišić, A. M. C. Ng and W. K. Chan, *The Journal of Physical Chemistry C*, 2013, **117**, 12218-12228.
2. Y. Li, W. Xie, X. Hu, G. Shen, X. Zhou, Y. Xiang, X. Zhao and P. Fang, *Langmuir*, 2010, **26**, 591-597.
3. M. Y. Guo, A. M. C. Ng, F. Liu, A. B. Djurišić and W. K. Chan, *Applied Catalysis B: Environmental*, 2011, **107**, 150-157.
4. Y. Wang, X. Liu, L. Guo, L. Shang, S. Ge, G. Song, N. Naik, Q. Shao, J. Lin and Z. Guo, *Journal of Colloid and Interface Science*, 2021, **599**, 566-576.
5. K. V. Karthik, A. V. Raghu, K. R. Reddy, R. Ravishankar, M. Sangeeta, N. P. Shetti and C. V. Reddy, *Chemosphere*, 2022, **287**, 132081.
6. Z. Mirzaeifard, Z. Shariatnia, M. Jourshabani and S. M. Rezaei Darvishi, *Industrial & Engineering Chemistry Research*, 2020, **59**, 15894-15911.
7. M. A. Qamar, S. Shahid, M. Javed, M. Sher, S. Iqbal, A. Bahadur and D. Li, *Colloids and Surfaces A: Physicochemical and Engineering Aspects*, 2021, **611**, 125863.
8. Y. Wang, S. Ge, W. Cheng, Z. Hu, Q. Shao, X. Wang, J. Lin, M. Dong, J. Wang and Z. Guo, *Langmuir*, 2020, **36**, 9658-9667.
9. H. S. Alanazi, N. Ahmad and F. A. Alharthi, *RSC Advances*, 2021, **11**, 10194-10202.
